# Supplementary material for: Quantification of alkalinity of deep eutectic solvents based on (H−) and NMR
Source: Royal Society of Chemistry journal article supplement (doi:10.1039/d3cp05590f), 2024-01-01
Supplement: d3cp05590f1.pdf [file d3cp05590f1.pdf]

## Quantification alkalinity of Deep Eutectic Solvents based on ( $H_+$ ) and NMR

Rui Qin<sup>a</sup>, Zeyu Wang<sup>a</sup>, Chenyang Wei<sup>a</sup>, Fengyi Zhou<sup>a</sup>, Yurun Tian<sup>a</sup>, Yu Chen<sup>b,\*</sup> and Tiancheng Mu<sup>a,\*</sup>

<sup>a</sup> Department of Chemistry, Renmin University of China, Beijing 100872, China, E-mail: [tcmu@ruc.edu.cn](mailto:tcmu@ruc.edu.cn).

<sup>b</sup> Department of Chemistry and Material Science, Langfang Normal University, Langfang 065000, Hebei, P.R. China, E-mail: [yuchen@iccas.ac.cn](mailto:yuchen@iccas.ac.cn)

**Table S1.** H. values for hydrazine aqueous solution measured in this work at room temperature and reported in the literature.

| Hydrazine (wt %) | H. (reported) | H. (measured) |
|------------------|---------------|---------------|
| 15               | 11.93         | 11.85         |
| 20               | 12.29         | 12.17         |
| 25               | 12.72         | 12.56         |
| 30               | 13.15         | 12.94         |

### Machine learning details:

Herein, the Pearson correlation coefficient  $\rho$  were applied to evaluate the relevance between two features, which can be expressed as:

$$\rho = \frac{\sum_i (x_i - \bar{x})(y_i - \bar{y})}{\sqrt{\sum_i (x_i - \bar{x})^2} \sqrt{\sum_i (y_i - \bar{y})^2}}$$

where  $x$  and  $y$  are two features and  $\bar{x}$  and  $\bar{y}$  are the mean values for all  $x$  and  $y$ .  $\rho$  value range from -1 to 1, and an absolute value close to 1 means a high linear relationship with two features.

Additionally, the coefficient of determination ( $R^2$ ) and mean squared error ( $MSE$ ) were applied for all algorithms to evaluated the accuracy of ML models.  $R^2$  reflects the prediction performance of a model and a high value close to 1 is required for an ideal model.  $MSE$  measures the difference between true and predicted values for all entities and a small value to zero is desired. Here,  $R^2$  can be expressed as followed:

$$R^2 = 1 - \frac{\sum_{i=1}^n (y_{pred} - y_{true})^2}{\sum_{i=1}^n (y_{pred} - \bar{y}_{pred})^2}$$

while  $MSE$  can be expressed:

$$MSE = \frac{\sum_{i=1}^n (y_{pred} - y_{true})^2}{n}$$

where  $y_{pred}$  and  $y_{true}$  represent the predicted and true values, and  $\bar{y}_{pred}$  stands for the average values of all  $y_{pred}$ .

**Table S2.** The key hyperparameters for each algorithm in our ML models applied for grid search (hyperparameters not mentioned were kept at their default values).

| Algorithms               | Hyperparameters                                                                                             |
|--------------------------|-------------------------------------------------------------------------------------------------------------|
| Random Forest Regression | n_estimators = [5, 10, 20, 50, 70, 100]<br>max_depth = [5, 6, 7, 9, 10, 20]<br>max_features = [0.6, 0.7, 1] |
| XGBoost Regression       | n_estimators = [5, 10, 20, 50, 70, 100, 200]<br>max_depth = [5, 6, 7, 8]                                    |

max\_delta\_step = [1, 3, 5, 7]

Artificial Neural Network

---

-

**Table S3.** The best hyperparameters for each algorithm in our ML models determined by ten-fold cross-validation (hyperparameters not mentioned were kept at their default values).

| Algorithms                | Hyperparameters                                          |
|---------------------------|----------------------------------------------------------|
| Random Forest Regression  | n_estimators = 5<br>max_depth = 9<br>max_features = 0.7  |
| XGBoost Regression        | n_estimators = 20<br>max_depth = 5<br>max_delta_step = 1 |
| Artificial Neural Network | -                                                        |

---

**Table S4.** The mean squared error (MSE) and coefficient of determination ( $R^2$ ) for different algorithm models.

|       | RF                    | XGB                   | ANN                   |
|-------|-----------------------|-----------------------|-----------------------|
| MSE   | $1.864 \cdot 10^{-5}$ | $1.929 \cdot 10^{-5}$ | $5.401 \cdot 10^{-5}$ |
| $R^2$ | 0.977                 | 0.976                 | 0.934                 |

---

**Table S5.** The synthetic guanidine DESs components and abbreviations.

| Name | Components                                                      | Abbreviation |
|------|-----------------------------------------------------------------|--------------|
| DES1 | Choline chloride/Tetramethylguanidine/ethylene glycol           | ChCl/TMG/EG  |
| DES2 | Choline chloride/Tetramethylguanidine/ Butyleneglycol           | ChCl/TMG/BDO |
| DES3 | Choline chloride/Tetramethylguanidine/ Poly(ethylene glycol)    | ChCl/TMG/PEG |
| DES4 | Choline chloride/ Ditolylguanidine /ethylene glycol             | ChCl/DTG/EG  |
| DES5 | Choline chloride/ Ditolylguanidine / Butyleneglycol             | ChCl/DTG/BDO |
| DES6 | Choline chloride/ Ditolylguanidine / Poly(ethylene glycol)      | ChCl/DTG/PEG |
| DES7 | Choline chloride/ 1,3-Diphenylguanidine /ethylene glycol        | ChCl/DPG/EG  |
| DES8 | Choline chloride/ 1,3-Diphenylguanidine / Butyleneglycol        | ChCl/DPG/BDO |
| DES9 | Choline chloride/ 1,3-Diphenylguanidine / Poly(ethylene glycol) | ChCl/DPG/PEG |

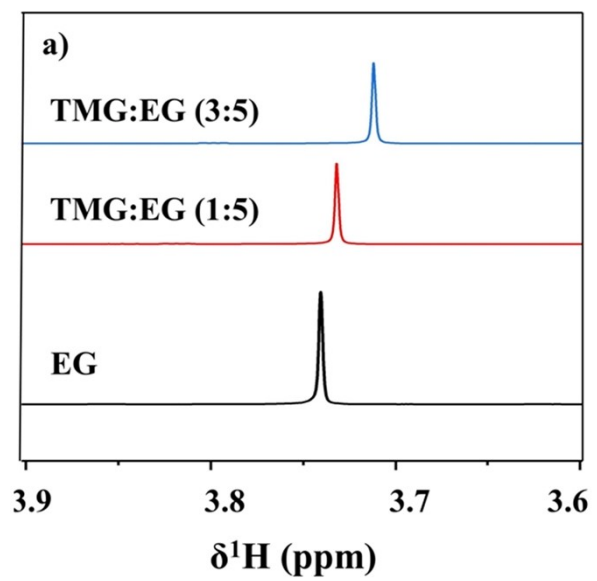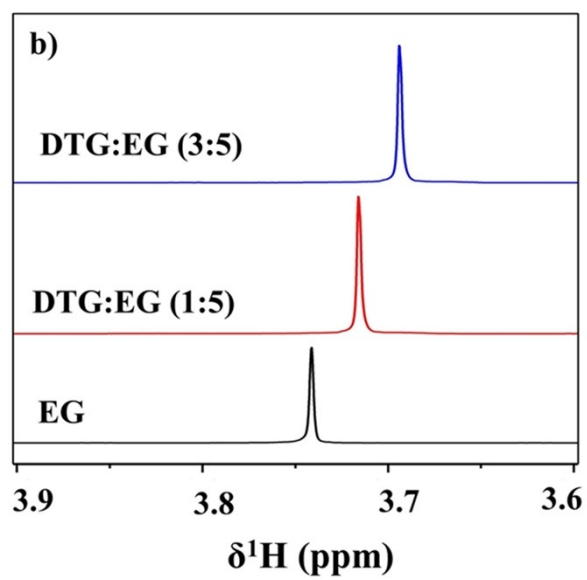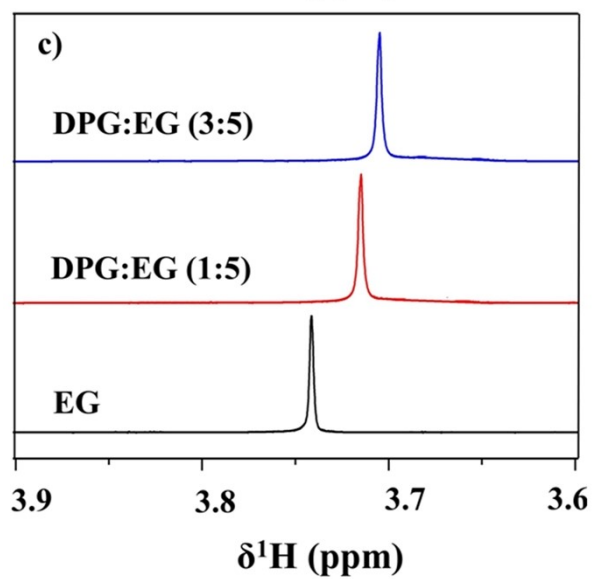

Fig. S1. <sup>1</sup>H NMR spectra of guanidine-based system.

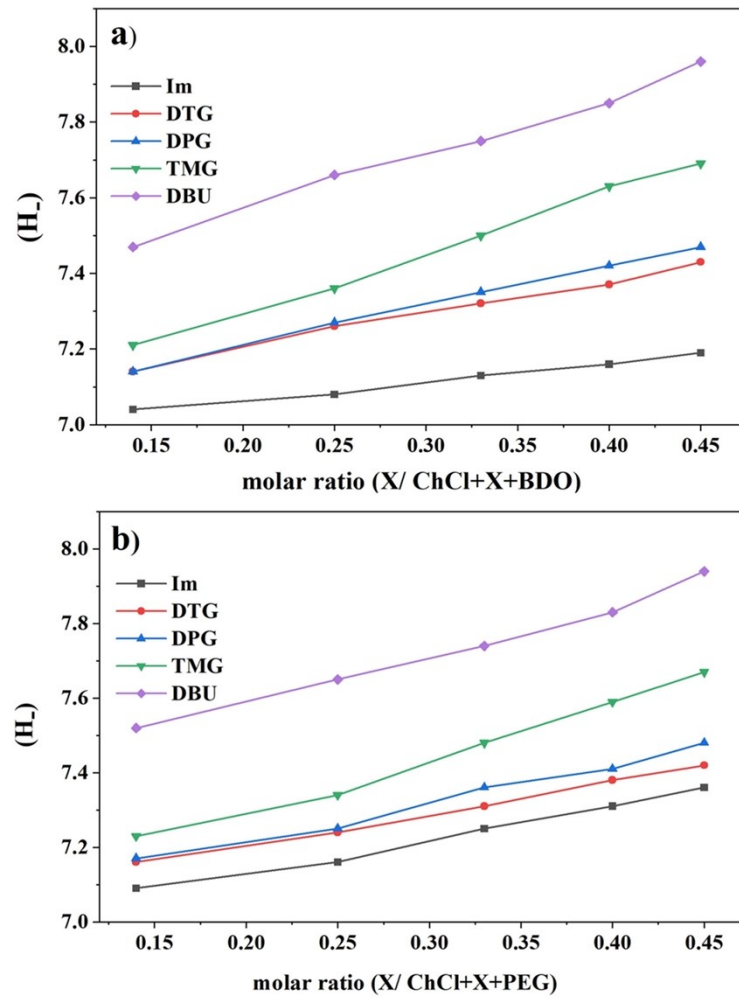

**Fig. S2.** a, b) The  $H_a$  of various DESs when changing the molar ratio of components, X represents the alkaline component.

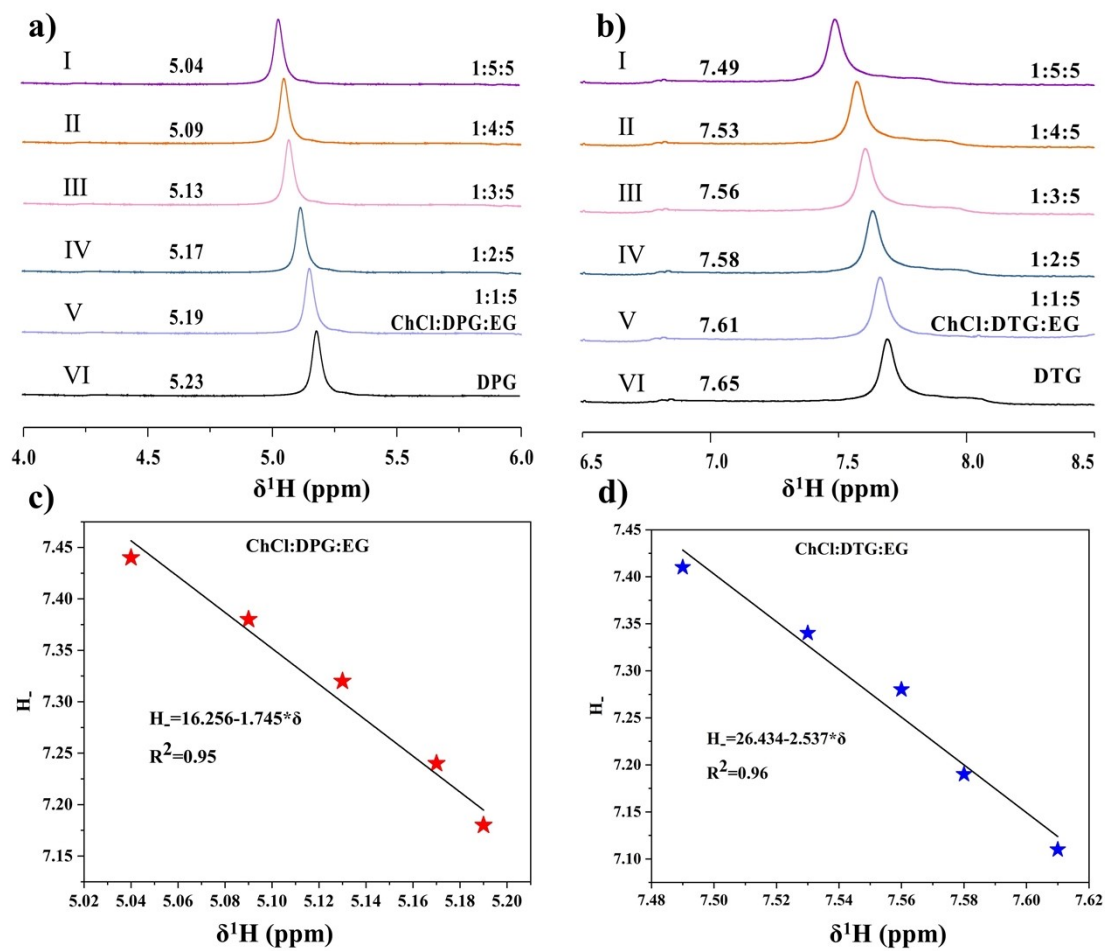

**Fig. S3.** a, b) Chemical shift of specific N-H protons of DPG and DTG molecules. c, d) the linear relationship between the chemical shift and  $H_{\cdot}$ .



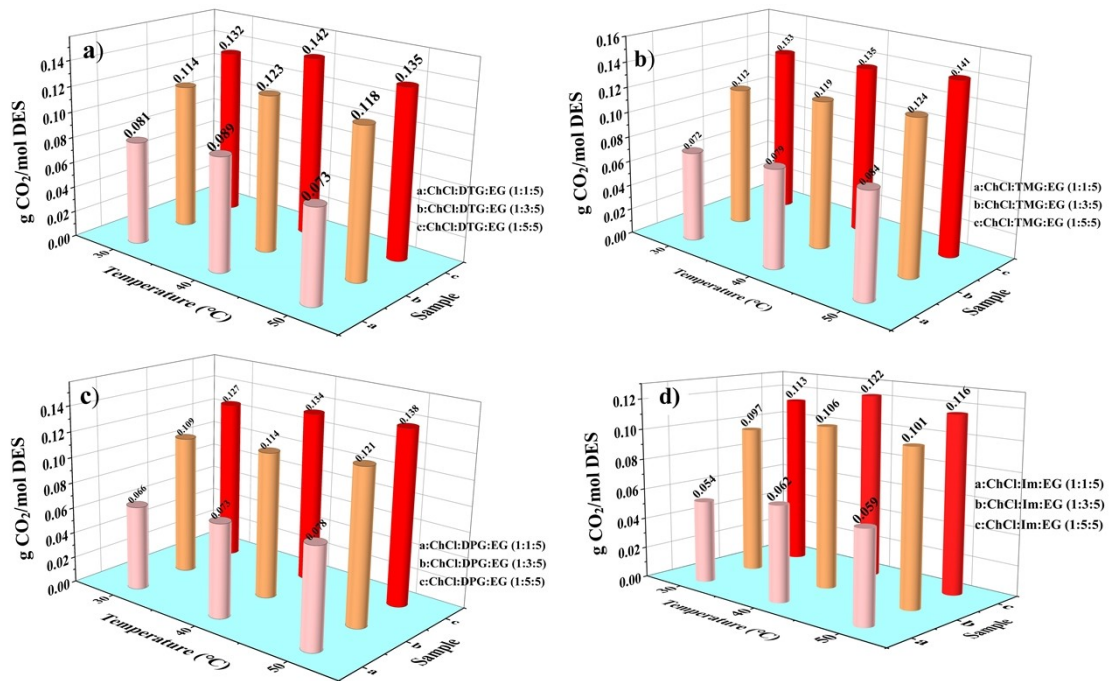

**Fig. S4.** CO<sub>2</sub> capture capacity of DESs with different molar ratio of components under different temperature (30 and 40 and 50 °C).

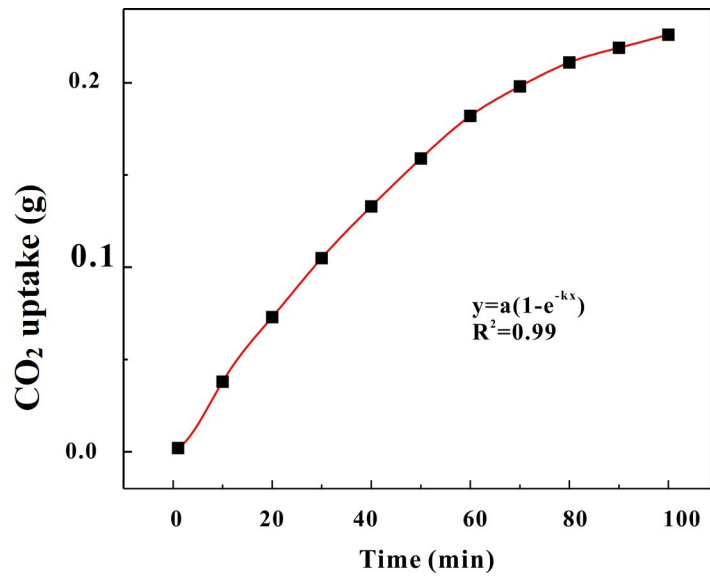

Fig. S5. CO<sub>2</sub> capture mass growth model.

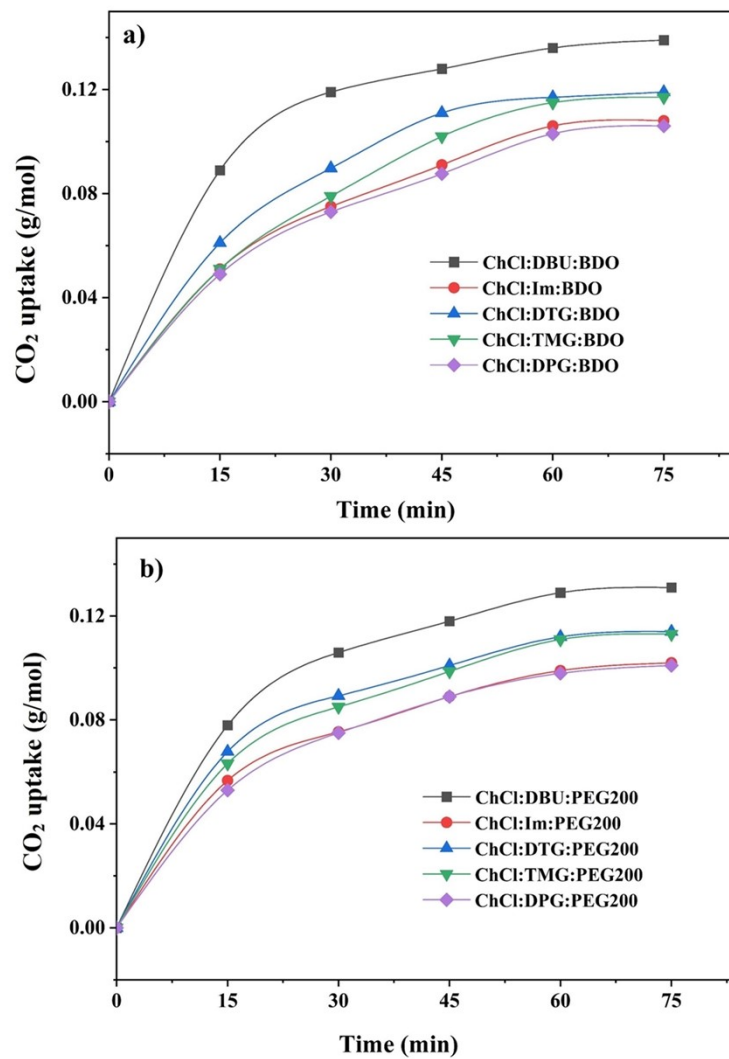

**Fig. S6.** Change the alcohol base composition, the CO<sub>2</sub> capture curves of various DESs with a molar ratio of control components of (1:3:5) at 40 °C. a), b) are BDO and PEG 200 , respectively.

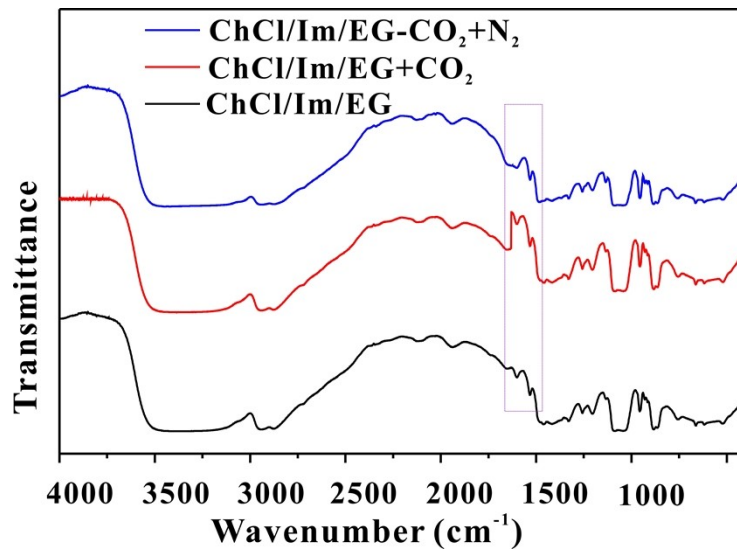

**Fig. S7.** FT-IR before and after CO<sub>2</sub> capture by Im-based DES.

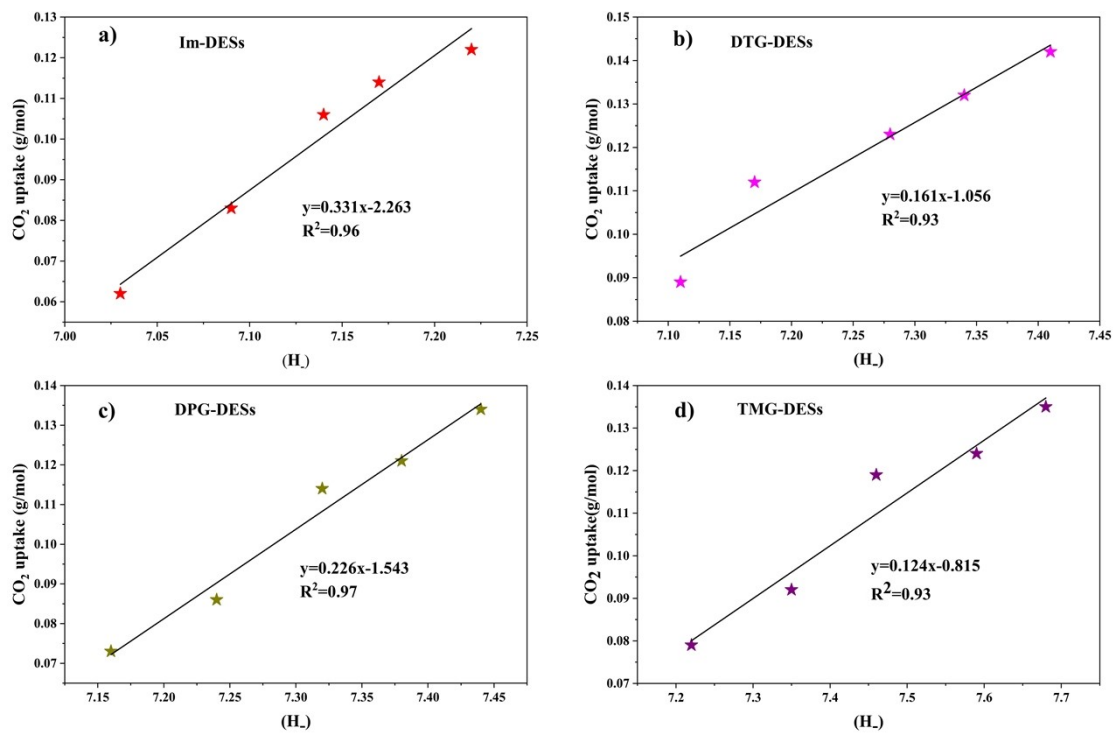

**Fig. S8.** The linear relationship between the H. value of different DESs and the CO<sub>2</sub> capture amount, the reaction temperature is 40 °C

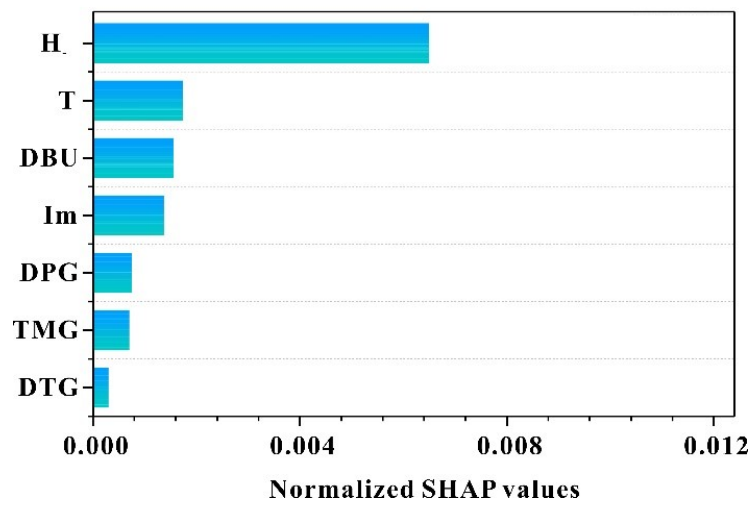

**Fig. S9.** SHAP feature importance for the testing data set of CO<sub>2</sub> capture in DESs.

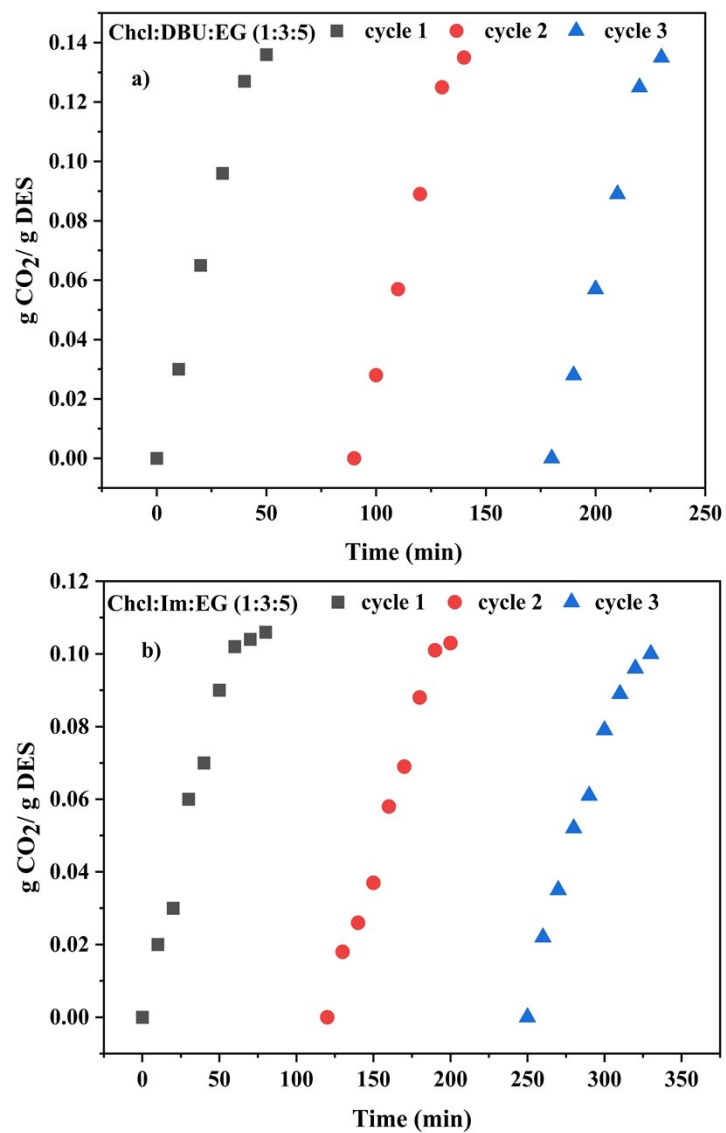

**Fig. S10.** CO<sub>2</sub> absorption/desorption cycles of two type DESs. a) the mole ratio is ChCl:DBU:EG (1:3:5), b) the mole ratio is ChCl:Im:EG (1:3:5). The desorption temperature is 80 °C under N<sub>2</sub> bubble condition.

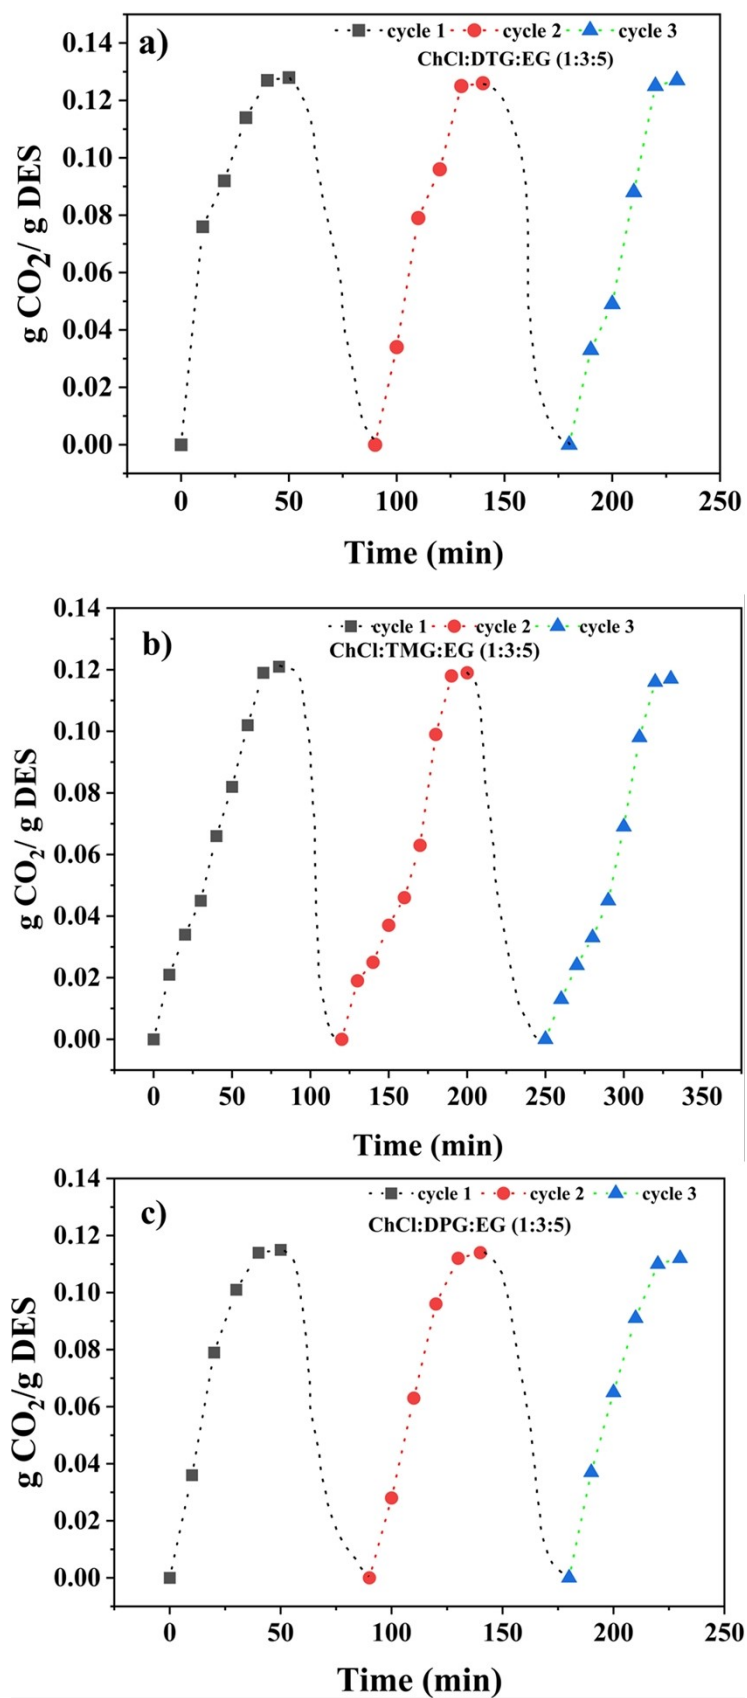

**Fig. S11.** CO<sub>2</sub> absorption/desorption cycles of three type DESs. a) the mole ratio is ChCl:DTG:EG (1:3:5), b) the mole ratio is ChCl:TMG:EG (1:3:5) and c) the mole ratio is ChCl:DPG:EG (1:3:5). The desorption temperature is 80 °C under N<sub>2</sub> bubble condition.



- 1 L. P. Hammett, *Chem. Rev.*, 1934, 67-79.
- 2 M. A. Paul and F. A. Long, *Chem. Rev.*, 1957, **57**, 1-45.
- 3 N. C. Deno, *J. Am. Chem. Soc.*, 1952, **74**, 2039-2041.
- 4 R. G. Bates and G. Schwarzenbach, *Helv. Chim. Acta*, 1955, **38**, 699-716.
- 5 S. J. Broderius, M. D. Kahl and M. D. Hoglund, *Environ. Toxicol. Chem.*, 1995, **14**, 1591-1605.
